sential neurotransmitters.<sup>19</sup> For that reason, severe impairment of neurological function might occur in the presence of a normal energy pool.

The quest for protection from hypoxia of the central nervous system will continue. The authors have raised a number of significant questions and are to be complimented for the meticulous development and presentation of some fascinating data.

PETER J. COHEN, M.D.  
*Professor and Chairman*  
*Department of Anesthesiology*  
*University of Michigan Medical School*  
*Ann Arbor, Michigan 48109*

### References

1. Hägerdal M, Welsh FA, Keykhah MM, et al: Protective effects of combinations of hypothermia and barbiturates in cerebral hypoxia in the rat. *ANESTHESIOLOGY* 49:165-169, 1978
2. Keykhah MM, Hägerdal M, Welsh FA, et al: Effect of high vs. low arterial blood oxygen content on cerebral energy metabolite levels during hypoxia with normothermia and hypothermia in the rat. *ANESTHESIOLOGY* 52:492-495, 1980
3. Lafferty JJ, Keykhah MM, Shapiro HM, et al: Cerebral hypometabolism obtained with deep pentobarbital anesthesia and hypothermia (30° C). *ANESTHESIOLOGY* 49:159-164, 1978
4. Michenfelder JD, Theye RA: The effects of anesthesia and hypothermia on canine cerebral ATP and lactate during anoxia produced by decapitation. *ANESTHESIOLOGY* 33:430-439, 1970
5. Carlsson C, Hägerdal M, Siesjö BK: Protective effect of hypothermia in cerebral oxygen deficiency caused by arterial hypoxia. *ANESTHESIOLOGY* 44:27-35, 1976
6. Berntman L, Welsh FA, Harp JR: Cerebral protective effect of low-grade hypothermia. *ANESTHESIOLOGY* 55:495-498, 1981
7. Hägerdal M, Harp J, Nilsson L, et al: The effect of induced hypothermia upon oxygen consumption in the rat brain. *J Neurochem* 24:311-316, 1975
8. Drewes LR, Gilboe DD: Glycolysis and the permeation of glucose and lactate in the isolated, perfused dog brain during anoxia and postanoxic recovery. *J Biol Chem* 248:2489-2496, 1973
9. Kaasik AE, Nilsson L, Siesjö BK: The effect of asphyxia upon the lactate, pyruvate and bicarbonate concentrations of brain tissue and cisternal CSF, and upon the tissue concentrations of phosphocreatine and adenine nucleotides in anesthetized rats. *Acta Physiol Scand* 78:443-447, 1970
10. Lehninger AL: *Biochemistry. The Molecular Basis of Cell Structure and Function*. New York, Worth Publishers, 1970, pp 326-327
11. Karetzky MS, Cain SM: Oxygen uptake stimulation following Na-L-lactate infusion in anesthetized dogs. *Am J Physiol* 216:1486-1490, 1969
12. Cain SM: Increased oxygen uptake with passive hyperventilation of dogs. *J Appl Physiol* 28:4-7, 1970
13. Karetzky MS, Cain SM: Effect of carbon dioxide on oxygen uptake during hyperventilation in normal man. *J Appl Physiol* 28:8-12, 1970
14. Drewes LR, Gilboe DD, Betz AL: Metabolic alterations in brain during anoxic-anoxia and subsequent recovery. *Arch Neurol* 29:385-390, 1973
15. Mršulja BB, Lust WD, Mršulja BJ, et al: Post-ischemic changes in certain metabolites following prolonged ischemia in the gerbil cerebral cortex. *J Neurochem* 26:1099-1103, 1976
16. Hossmann K-A, Sato K: Recovery of neuronal function after prolonged cerebral ischemia. *Science* 168:375-376, 1970
17. Hossmann K-A, Kleihues P: Reversibility of ischemic brain damage. *Arch Neurol* 29:375-384, 1973
18. Ames A, Wright RL, Kowada M, et al: Cerebral ischemia. II. The no-reflow phenomenon. *Am J Pathol* 52:437-453, 1968
19. Robin ED: Of men and mitochondria: Coping with hypoxic dysoxia. *Am Rev Respir Dis* 122:517-531, 1980

Anesthesiology  
55:493-494, 1981

## *Analgesia, Anesthesia and Chest Wall Motion*

CHANGES in chest wall (diaphragm, thoracic plus abdominal wall) shape and motion under the influence of analgetics, anesthetics, or positive airway pressure during muscular paralysis are of interest both to the practicing anesthesiologist, who can use them in staging the depth of anesthesia<sup>1</sup> and to the physiologist,<sup>2</sup> who can use them as a tool. In this issue of *ANESTHESIOLOGY* appears a stimulating report<sup>3</sup> documenting a reduction in tidal volume and respiratory frequency during CO<sub>2</sub> rebreathing after morphine administration in humans, and also demonstrating reduction in the tidal volume contribution from rib cage motion at equivalent end-tidal CO<sub>2</sub> concentrations, comparing the sedated to the unsedated state. When the tidal volume contributions from rib cage or diaphragm were plotted as a function of the tidal volume rather than of carbon dioxide tension, no effect of mor-

phine could be detected comparing the sedated and unsedated states. Since the effects of halothane<sup>4</sup> on the rib cage appear similar, the authors suggested that both morphine and halothane act by exerting a direct action on respiratory neurones in the medulla. This conclusion implies a model of the respiratory control mechanisms in which a central pattern generator in the brainstem drives the diaphragm and intercostal/accessory muscles in set patterns which vary as tidal volume changes, in response to change in chemical stimulus. Analgetic and anesthetic agents then act by decreasing the gain of the central pattern generator in response to a given change in the chemical stimulus without altering the set pattern for a given tidal volume. This attractively simple unifying hypothesis requires careful examination. Examination of the receptor sites for endogenous or exogenous opiates in the central nervous system<sup>5,6</sup> and observations of the actions of opiate antagonists on the H-reflex at spinal

Accepted for publication July 8, 1981.

cord level,<sup>7</sup> as well as on respiratory control mechanisms in the brainstem itself,<sup>8</sup> suggest that many sites of action may exist. Therefore, it appears that to confine thought to one mechanism may be an oversimplification, but is nevertheless a valuable starting point for investigation.

Changes in chest wall shape and motion during anesthesia are further illustrated by a second report<sup>9</sup> in this issue describing changes in functional residual capacity and in the anterior-posterior diameter and circumference of the chest wall after induction of anesthesia with thiopental and during lung inflation with and without muscle paralysis.

It is important to note that both groups of investigators<sup>3,9</sup> measured changes in only one diameter of the chest wall. Changes of dimension in only one axis may not completely reflect changes in chest wall motion, hence caution must be exercised when extrapolating these measurements to volume contribution by rib cage or abdominal-diaphragmatic components of the chest wall. For this reason Hedenstierna *et al.*<sup>9</sup> are careful not to draw conclusions about the contribution of the rib cage to tidal volume during spontaneous breathing with thiopental anesthesia. If their finding<sup>9</sup> of an increased excursion of the rib cage during spontaneous breathing under anesthesia were to mean that there was an increased rib cage contribution to tidal volume and if tidal volume itself had been reduced at equivalent end-tidal CO<sub>2</sub> concentrations after thiopental, this would contradict the hypothesis of Rigg and Rondi.

Possible links between alteration in motion and shape of the chest wall and pulmonary gas exchange have not been addressed by either of these two reports in this issue. A different shape of the lung may lead to an altered distribution of inspired gas (ventilation/unit lung volume) depending on the shape change. An altered distribution of inspired gas from that seen during awake spontaneous breathing has been shown to occur during general anesthesia, both with<sup>10</sup> and without<sup>11</sup> muscle paralysis. This altered distribution of inspired gas is consistent with a different pattern of motion of the respiratory system. If the distribution of inspired gas is altered and if the distribution of perfusion does not adjust, ventilation-perfusion mismatching and impaired gas exchange may ensue.

From a review of the available evidence one of us<sup>12</sup> suggested that it is the change in the shape of the lungs resulting from changes in chest wall shape and motion, which is the initial factor responsible for impaired gas exchange during anesthesia, either with spontaneous breathing or mechanical ventilation.

H. M. MARSH, M.B.

*Associate Professor of Anesthesiology*

K. REHDER, M.D.

*Professor of Anesthesiology and Physiology*

T. J. KNOPP

*Assistant Professor of Anesthesiology*

*Mayo Clinic/Foundation*

*Rochester, Minnesota 55901*

### References

1. Gillespie NA: The signs of anaesthesia. *Anesth Analg (Cleve)* 22:275-282, 1943
2. Sears TA: Breathing: A sensori-motor act, *The Scientific Basis of Medicine Annual Reviews*. Edited by Gilliland, I, Francis, J. London, The Athlone Press, 1971, pp 129-147
3. Rigg JRA, Rondi P: Changes in rib cage and diaphragm contribution to ventilation after morphine. *ANESTHESIOLOGY* 55:507-514, 1981
4. Tusiewicz K, Bryan AC, Froese AB: Contributions of changing rib cage-diaphragm interactions to the ventilatory depression of halothane anesthesia. *ANESTHESIOLOGY* 47:327-337, 1977
5. Atweh SF, Kuhar MJ: Autoradiographic localization of opiate receptors in rat brain: I. Spinal cord and lower medulla. *Brain Res* 124:53-67, 1977
6. Atweh SF, Kuhar MJ: Autoradiographic localization of opiate receptors in rat brain: II. The brain stem. *Brain Res* 129:1-12, 1977
7. Boureau F, Willer JC, Dauthier C: Study of naloxone in normal awake man: Effects on spinal reflexes. *Neuropharmacol* 17:565-568, 1978
8. Lawson EE, Waldrop TG, Eldridge FL: Naloxone enhances respiratory output in cats. *J Appl Physiol* 47:1105-1111, 1979
9. Hedenstierna G, Löfstrom B, Lundh R: Thoracic gas volume and chest-abdomen dimensions during anesthesia and muscle paralysis. *ANESTHESIOLOGY* 55:499-506, 1981
10. Rehder K, Sessler AD, Rodarte JR: Regional intrapulmonary gas distribution in awake and anesthetized-paralyzed man. *J Appl Physiol* 42:391-402, 1977
11. Rehder K, Sessler AD: Function of each lung in spontaneously breathing man anesthetized with thiopental-meperidine. *ANESTHESIOLOGY* 38:320-327, 1973
12. Rehder K: Anaesthesia and the respiratory system. *Can Anaesth Soc J* 26:451-462, 1979
